# Supplementary material
Source: Springer Nature journal article supplement (https://www.springermedizin.de/resource/supplementary/12913_2010_1571_MOESM4_ESM.pdf/9529272)

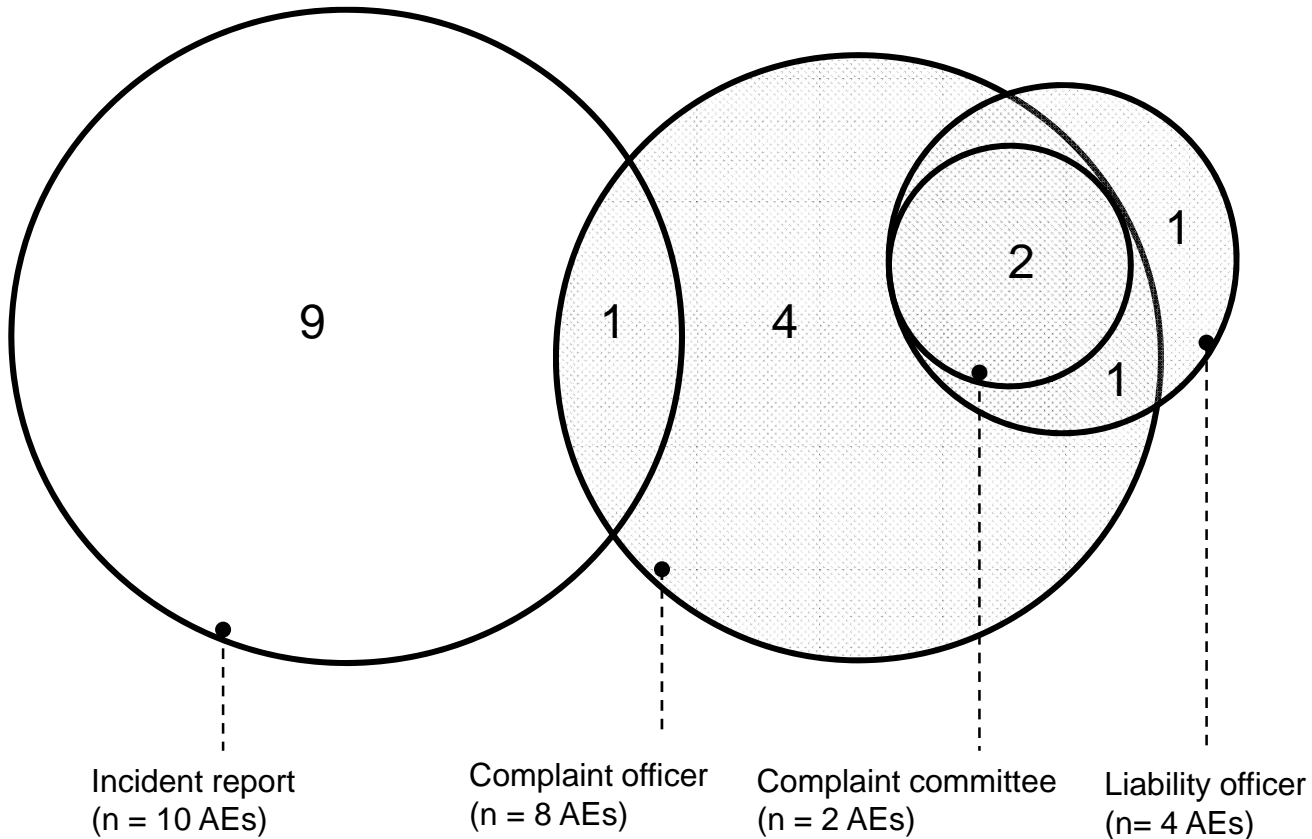

Supplement: MOESM4 [file 9529272]
